# Supplementary material for: CREB3L4 promotes hepatocellular carcinoma progression and decreases sorafenib chemosensitivity by promoting RHEB-mTORC1 signaling pathway
Source: PubMed Central journal article supplement (PMC10831937; doi:10.1016/j.isci.2024.108843), 2024-01-09
Supplement: mmc1.pdf [file mmc1.pdf]

iScience, Volume 27

## **Supplemental information**

**CREB3L4 promotes hepatocellular carcinoma  
progression and decreases sorafenib chemosensitivity  
by promoting RHEB-mTORC1 signaling pathway**

**Zhengchen Jiang, Bowen Shi, Yun Zhang, Tianming Yu, Yang Cheng, Jiankang  
Zhu, Guangyong Zhang, Mingwei Zhong, Sanyuan Hu, and Xiaomin Ma**

**Supplementary Table 1 Clinicopathological characteristics of HCC patients, related to STAR Method (Clinical samples)**

| <b>Characteristics</b>         | <b>Cohort 1 (n=83)</b> | <b>Cohort 2 (n=20)</b> |
|--------------------------------|------------------------|------------------------|
| <b>Gender</b>                  |                        |                        |
| Male                           | 71(85.5%)              | 16(80.0%)              |
| Female                         | 12(14.5%)              | 4(20.0%)               |
| <b>Age</b>                     |                        |                        |
| <60 yrs                        | 59(71.1%)              | 12(60.0%)              |
| ≥60 yrs                        | 24(28.9%)              | 8(40.0%)               |
| <b>Liver cirrhosis history</b> |                        |                        |
| Yes                            | 18 (21.6%)             | 10(50.0%)              |
| No                             | 65 (78.4%)             | 10(50.0%)              |
| <b>TNM stages</b>              |                        |                        |
| I                              | 7(8.4%)                | 4(20.0)                |
| II                             | 47(56.7%)              | 9(45.0%)               |
| III                            | 29(34.9%)              | 7(35.0%)               |
| IV                             | 0(0%)                  | 0(0%)                  |
| <b>Pathological staging</b>    |                        |                        |
| I                              | 16(1.1%)               | 8(40.0%)               |
| II                             | 59(45.6%)              | 10(50.0%)              |
| III                            | 8(53.3%)               | 2(10.0%)               |

Cohort 1 was derived from the HCC tissue chip purchased from Outdo Biotech (Shanghai, China). Cohort 2 was derived from patients with HCC admitted to our hospital for treatment.

**A**

HUH7

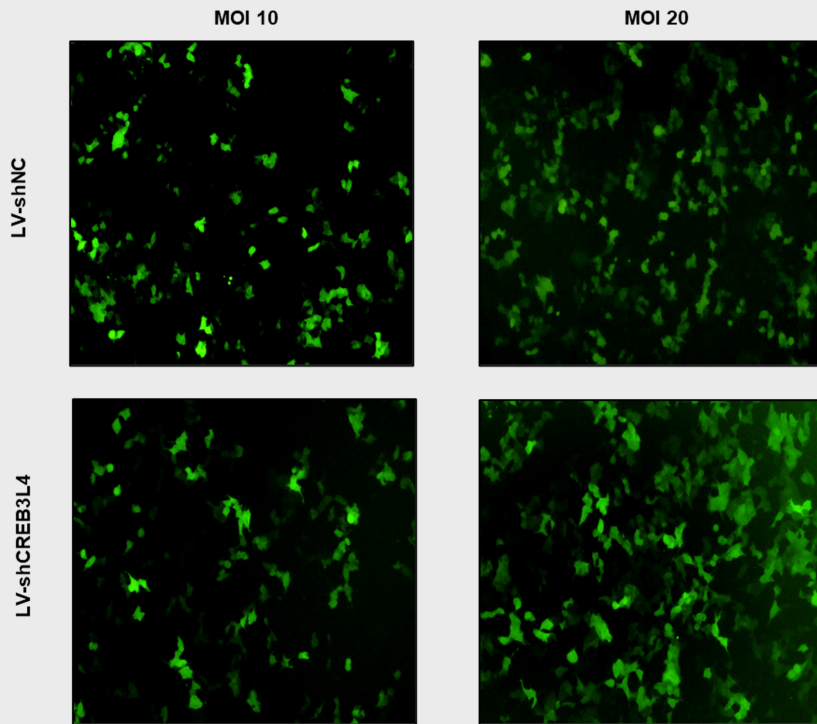**B**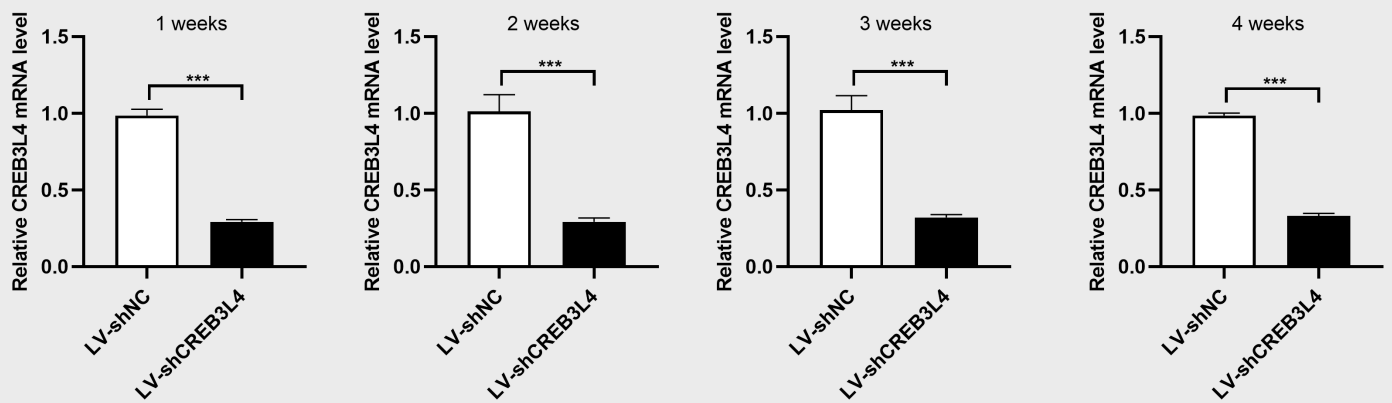**C**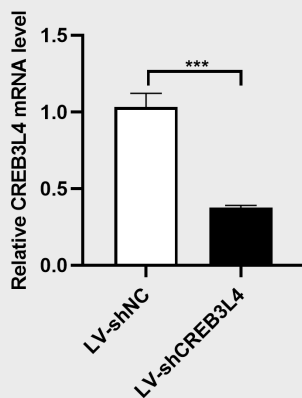

**Supplementary Figure 1 Construction of stable infection of HUH7 cells with Lentivirus (LV)-shCREB3L4 plasmid, related to STAR Method (Construction of stable infection of HUH7 cells with Lentivirus (LV)-shCREB3L4 plasmid).**

(A) Lentiviral transfection of HUH7 cell lines was performed using a MOI of 10 or 20 viral loads, and the fluorescence intensity was observed under the microscope. (B) The qRT-PCR was performed to detect the effective knockdown of HUH7 cells infected with LV-shCREB3L4 after infected for 4 weeks.

(C) The qRT-PCR was performed to detect the effective knockdown of dissected tumors.

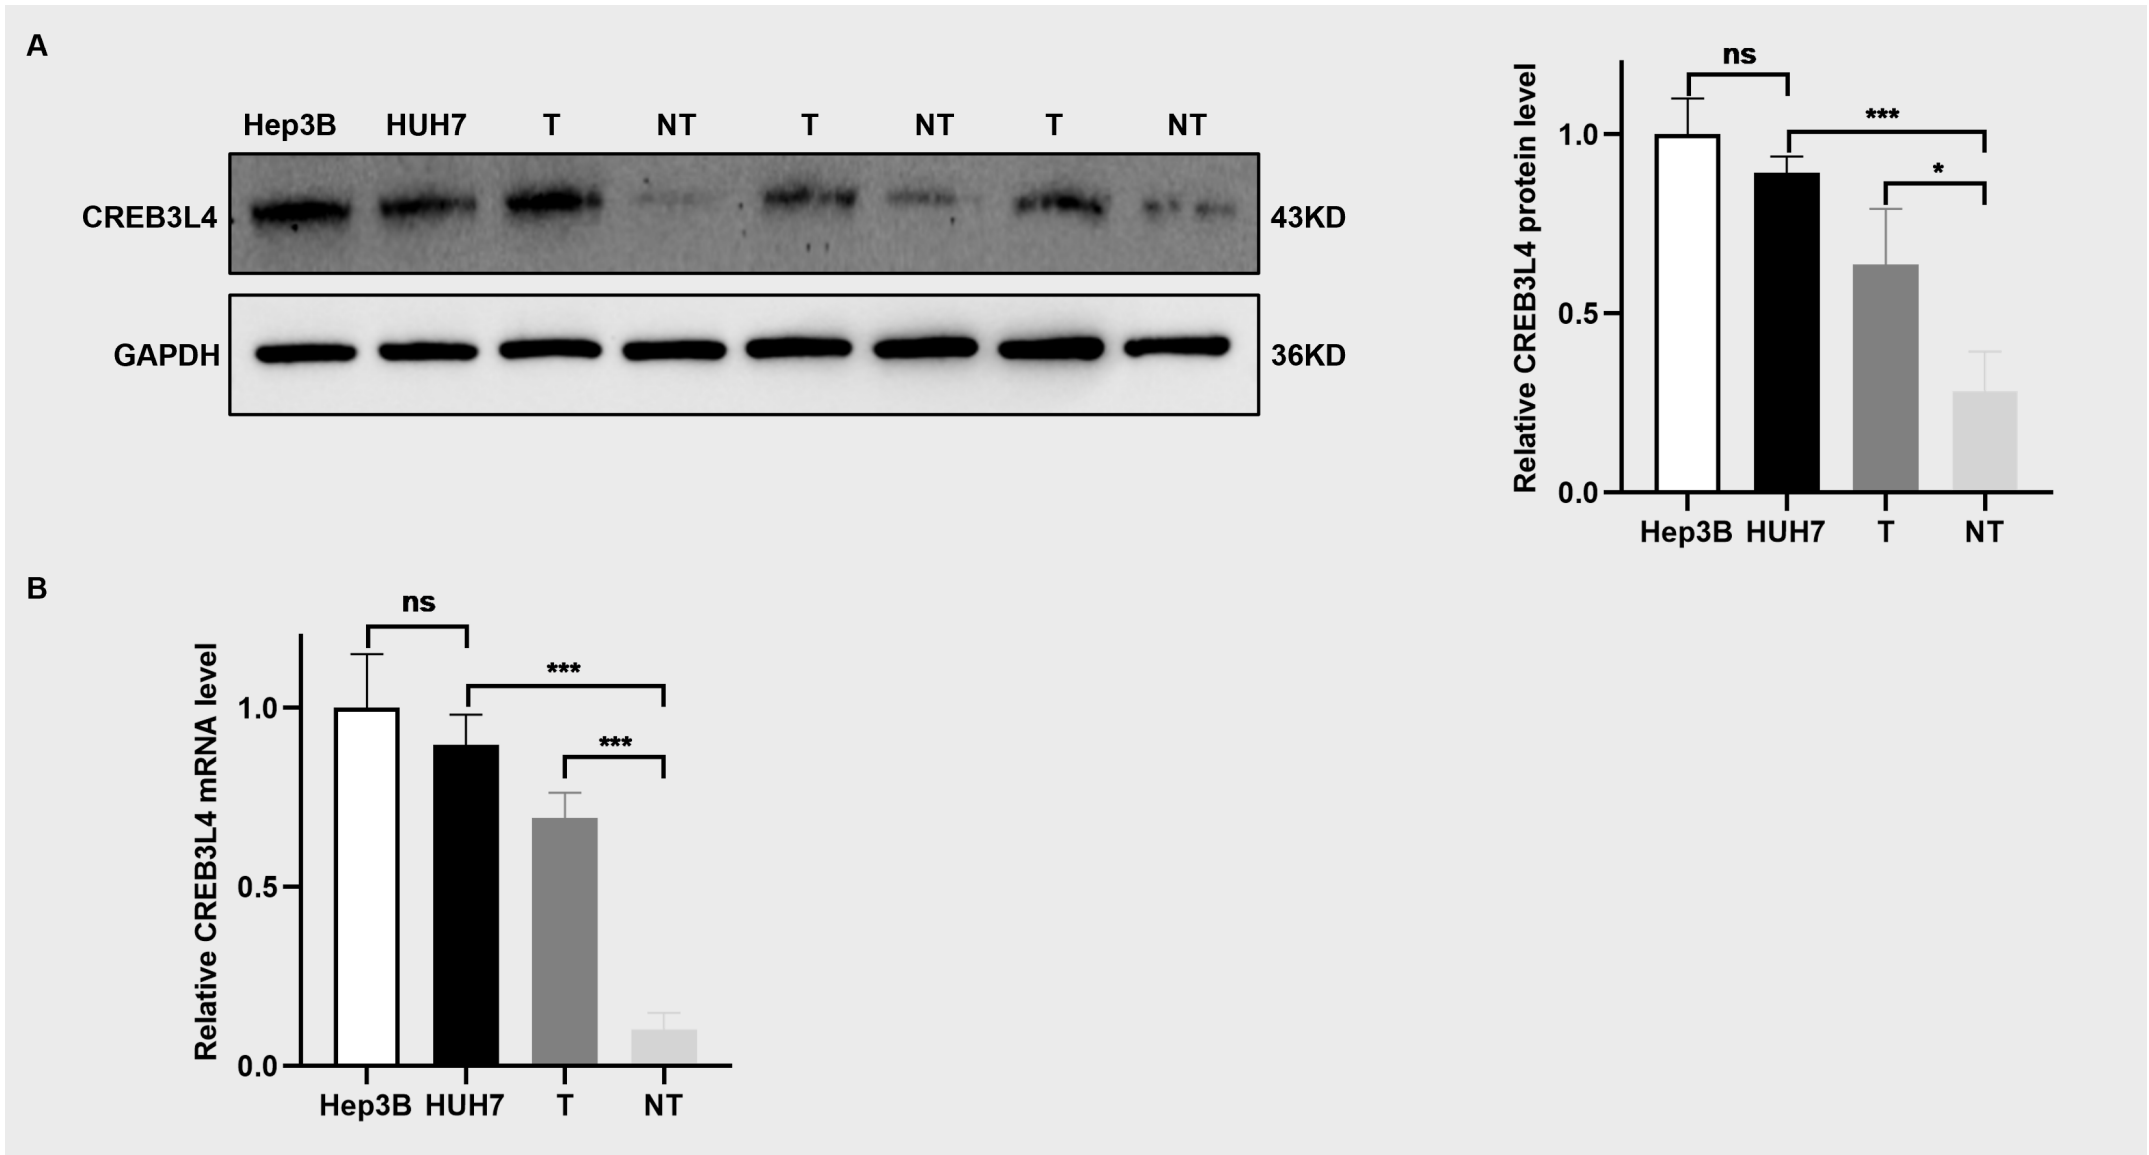

**Supplementary Figure 2 Basal level of CREB3L4 in HCC cell lines and clinic samples, related to Figure 1.** (A) Western blot assay was conducted to measure the relative expression of the CREB3L4 protein in HUH7, Hep3B cells, tumor tissues (T) and the normal tissues (NT). Western blot bands were analyzed by ImageJ software. (B) qRT-PCR analysis was conducted to measure the relative expression of the CREB3L4 mRNA in HUH7, Hep3B cells, tumor tissues (T) and the normal tissues (NT).

**A**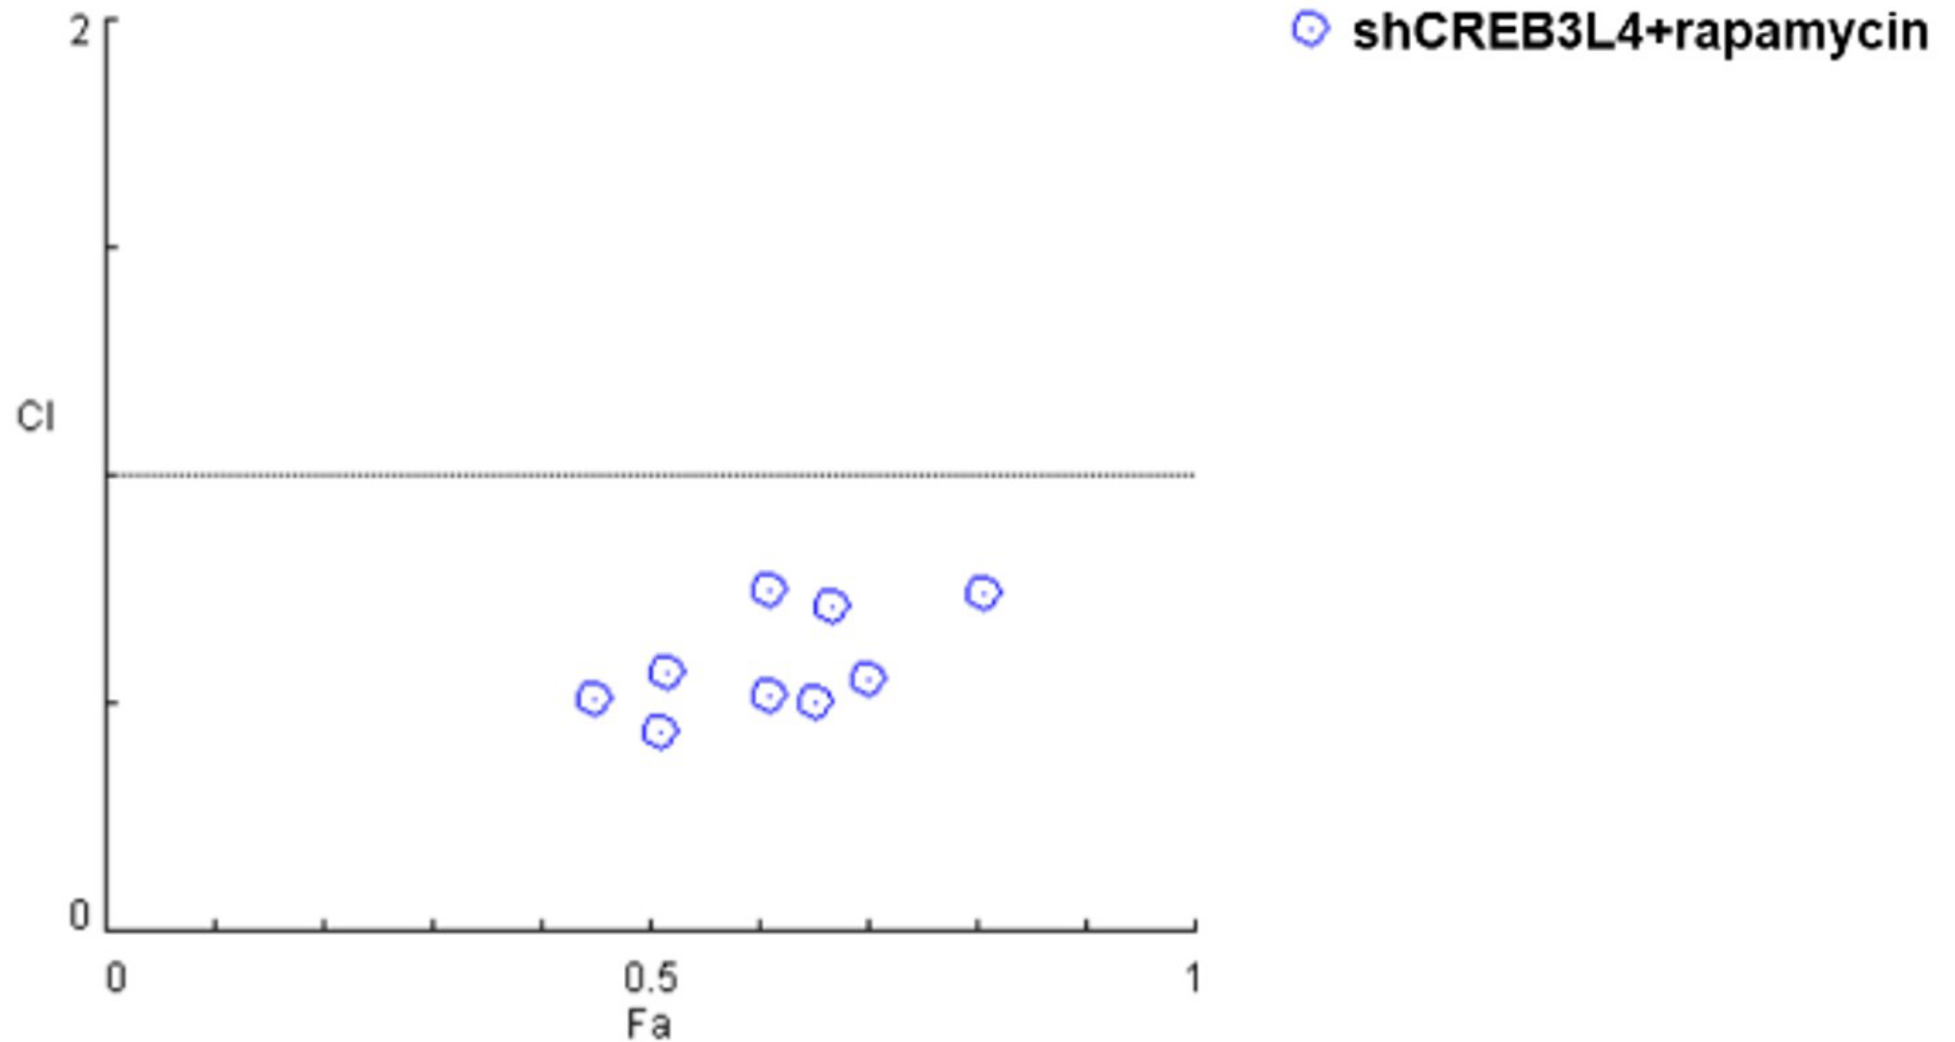

**Supplementary Figure 3 Combination index values of rapamycin, related to Figure 3.** (A) HUH7 cells ( $1 \times 10^4$  cells/well) were transfected with different dosages of shCREB3L4 plasmid (0.5  $\mu\text{g/ml}$ , 1  $\mu\text{g/ml}$ , and 2  $\mu\text{g/ml}$ ) and different dosages of rapamycin (20 nM, 40 nM, and 80 nM). Cellular viability was detected by CCK-8 assay after treating with shCREB3L4 and rapamycin for 48 hr. Combination index values were calculated by Compusyn software, and drug interaction was indicated as synergism ( $\text{CI} < 0.9$ ), additivity ( $0.9 < \text{CI} < 1.1$ ) or antagonism ( $\text{CI} > 1.1$ ).

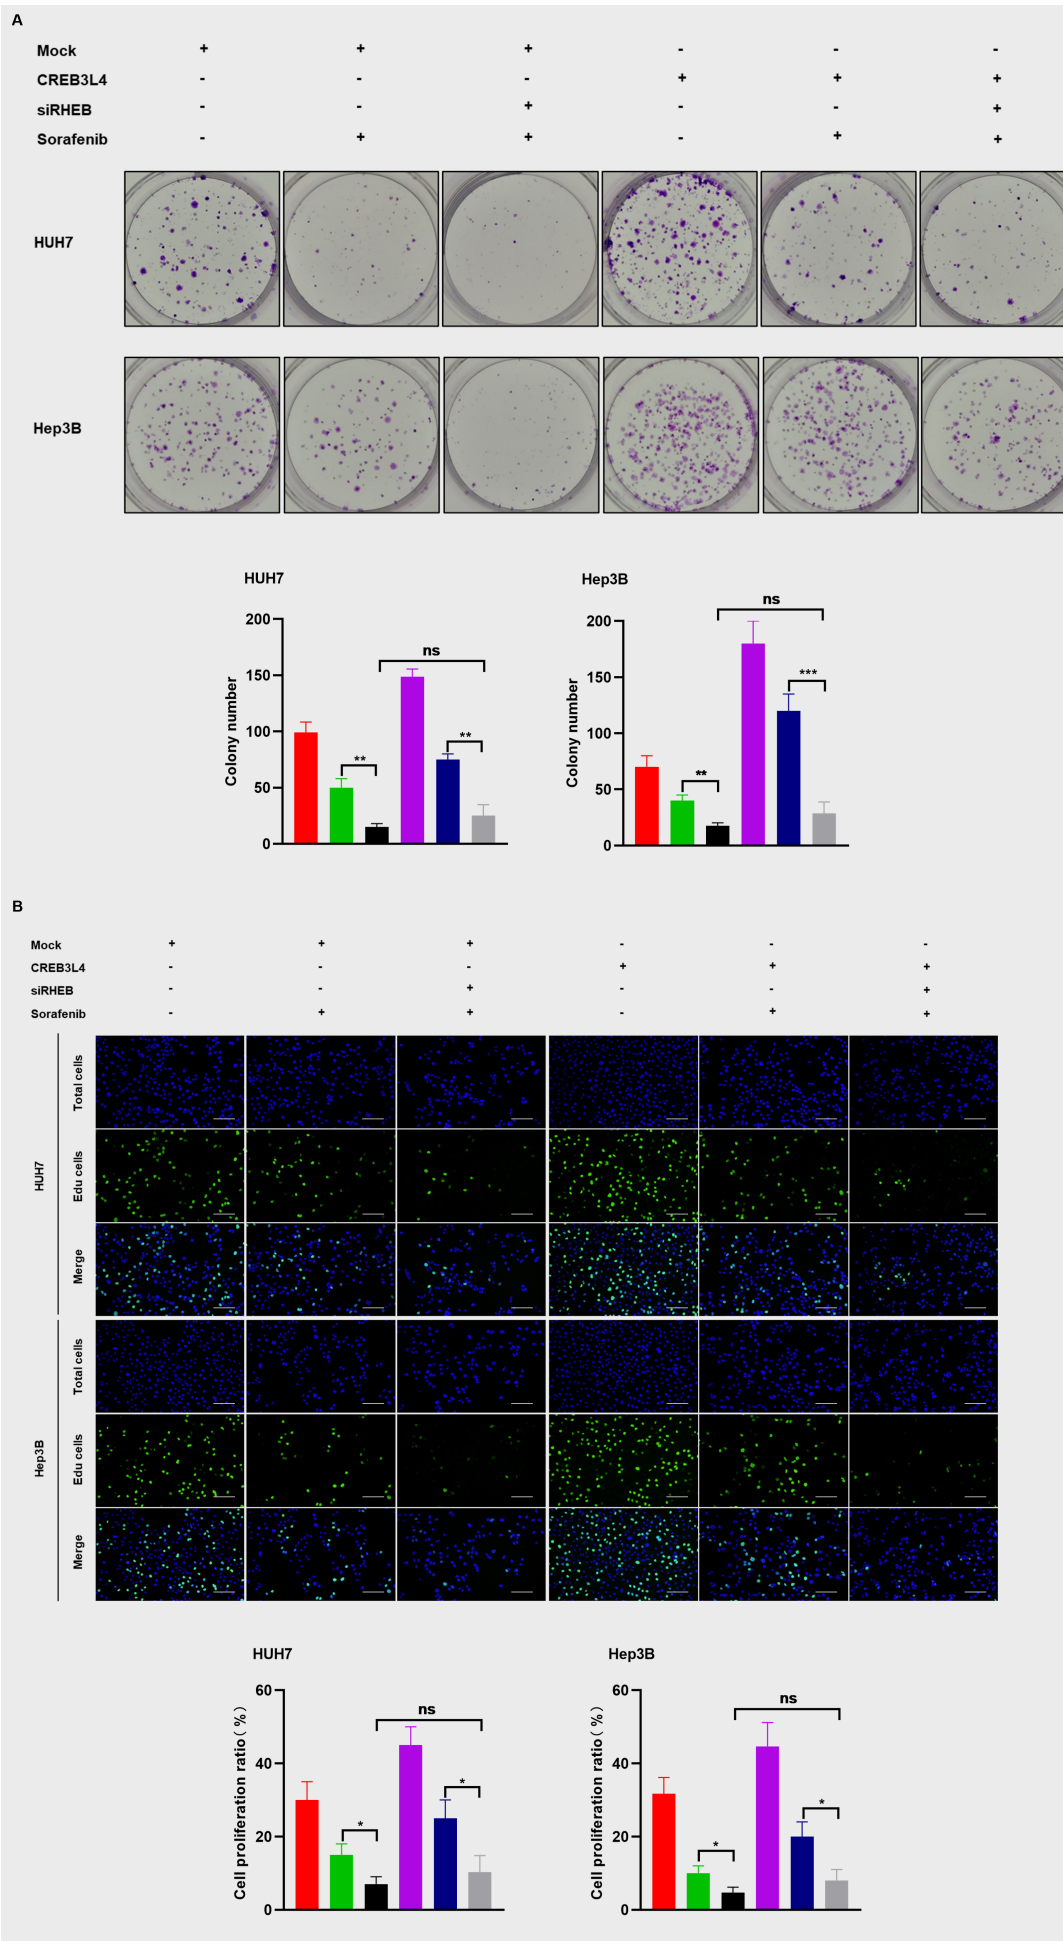

**Supplementary Figure 4 RHEB knockdown reversed the promoting effects of CREB3L4 on the proliferation of HUH7 and Hep3B cells, related to Figure 4.** (A) HUH7 and Hep3B cells were transfected with CREB3L4 overexpressing plasmid or siRHEB. Approximately 24 hr after transfection, cells were treated with sorafenib (10  $\mu$ M) for 48 hr. Colony formation assay was performed to detect the proliferation of the cells. (B) Cell proliferation was detected by EdU assays. \*  $P < 0.05$ , \*\* $P < 0.01$ , \*\*\* $P < 0.001$  for statistical analysis of the indicated groups.

**A**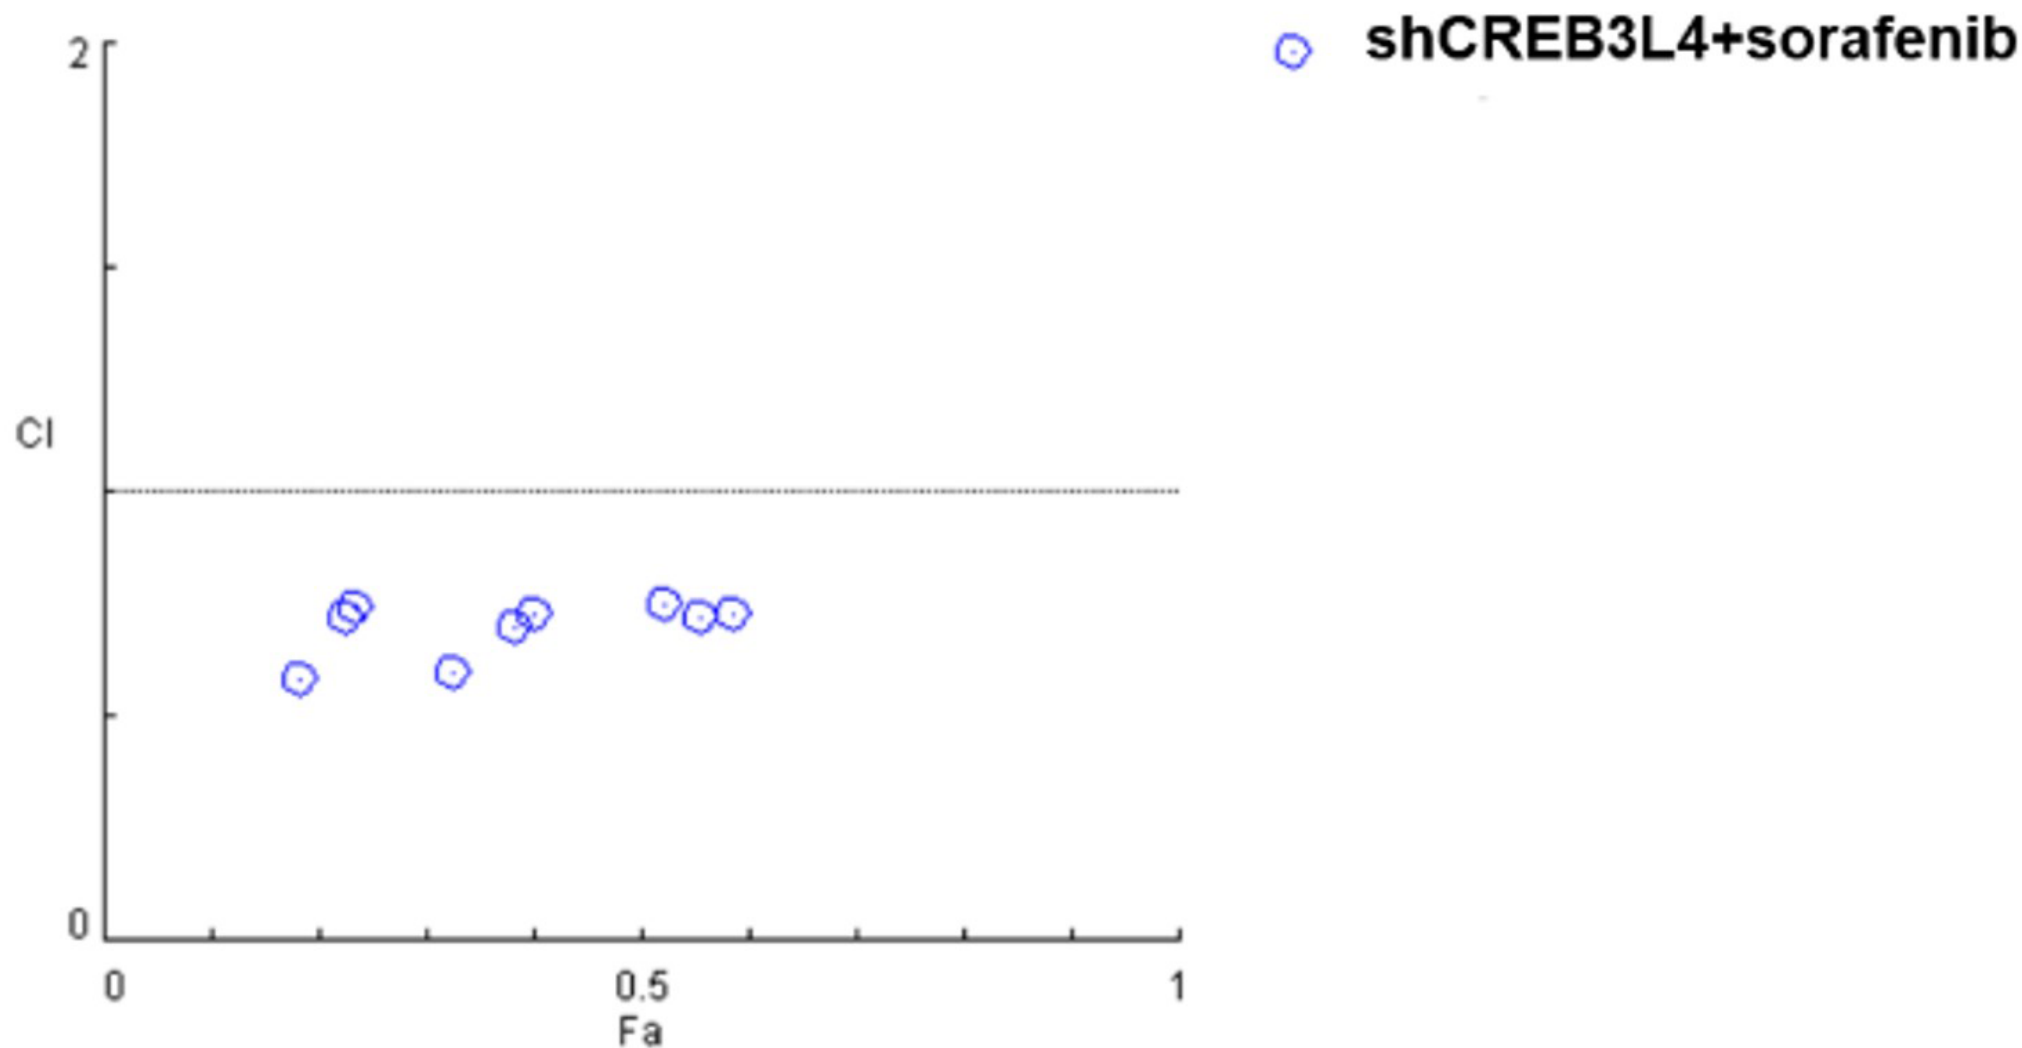

**Supplementary Figure 5 Combination index values of sorafenib, related to Figure 5.**

(A) HUH7 cells ( $1 \times 10^4$  cells) were transfected with different dosages of shCREB3L4 plasmid (0.5  $\mu\text{g/ml}$ , 1  $\mu\text{g/ml}$ , and 2  $\mu\text{g/ml}$ ) and different dosages of sorafenib (5  $\mu\text{M}$ , 10  $\mu\text{M}$ , and 20  $\mu\text{M}$ ). Cell viability was detected by CCK-8 assay after treating with shCREB3L4 and sorafenib for 48 hr. Drug interaction was indicated as synergism ( $\text{CI} < 0.9$ ), additivity ( $0.9 < \text{CI} < 1.1$ ) or antagonism ( $\text{CI} > 1.1$ ).

**CREB3L4**  
**43KD**

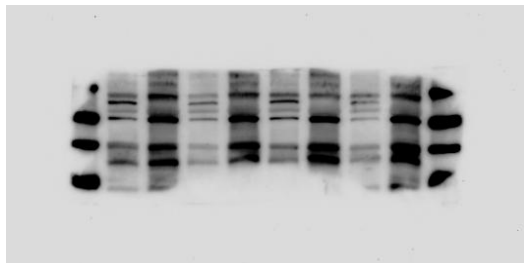

**GAPDH**  
**36KD**

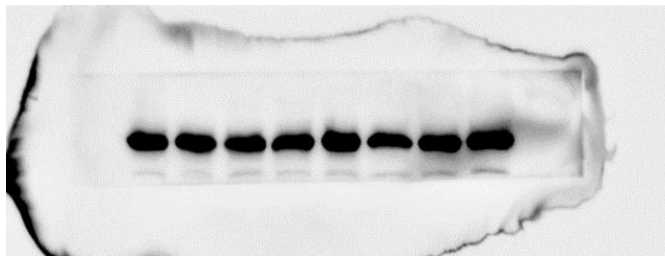

**Data S1 Original images of Western blot, related to Figure 1E.**



HUH7  
CREB3L4  
43KD

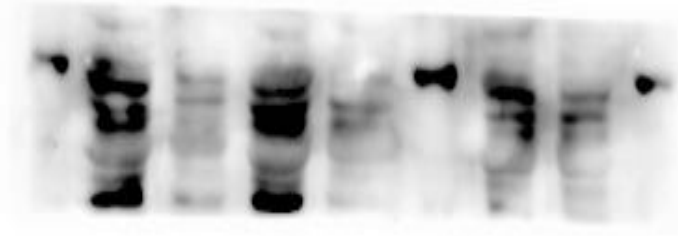

HUH7  
GAPDH  
36KD

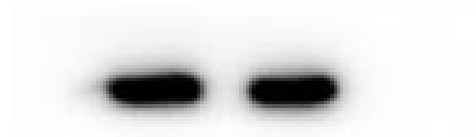

Hep3B  
CREB3L4  
43KD

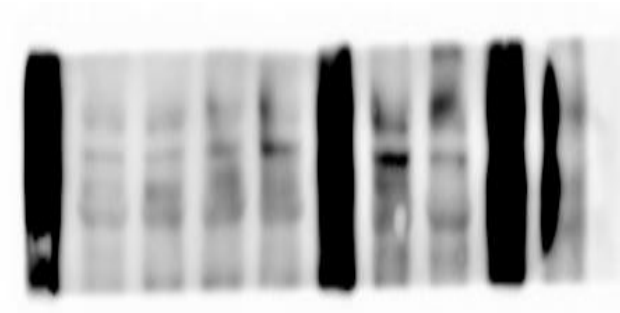

Hep3B  
GAPDH  
36KD

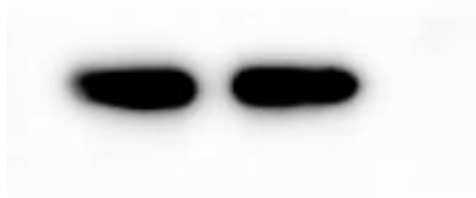

Data S2 Original images of Western blot, related to Figure 2C.

HUH7  
HA-  
CREB3L4  
43KD

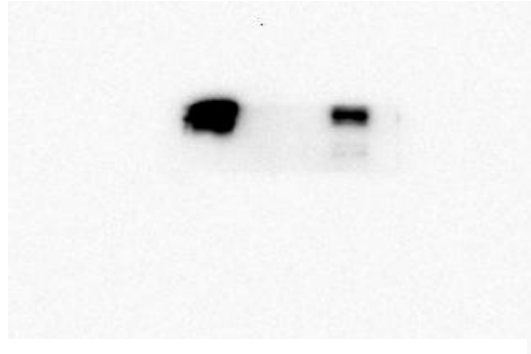

HUH7  
GAPDH  
36KD

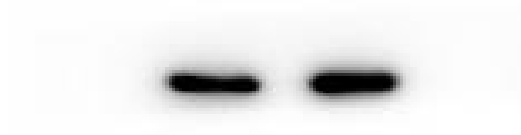

Hep3B  
HA-  
CREB3L4  
43KD

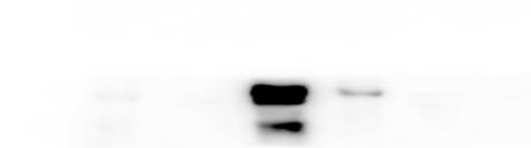

Hep3B  
GAPDH  
36KD

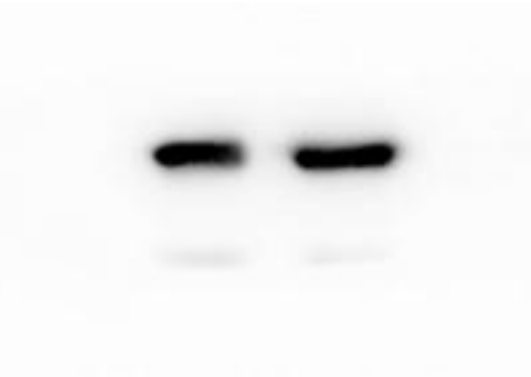

**Data S3 Original images of Western blot, related to Figure 2D.**

HUH7

HA-CREB3L4  
43KD

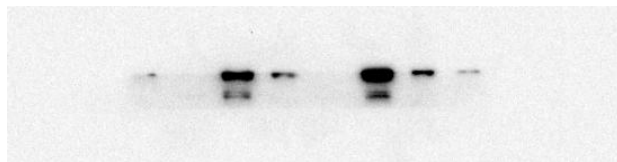

p-mTOR  
289KD

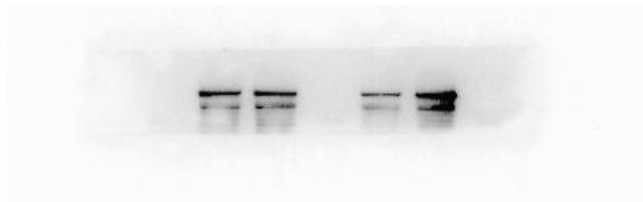

mTOR  
289KD

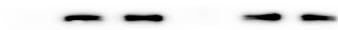

p-S6K1  
70KD

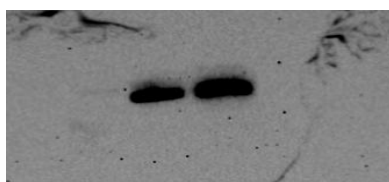

S6K1  
70KD

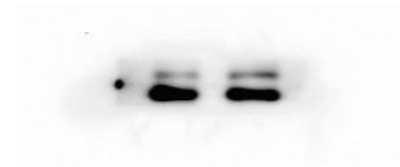

p-S6  
32KD

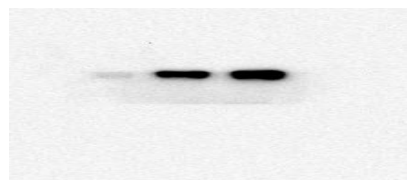

S6  
32KD

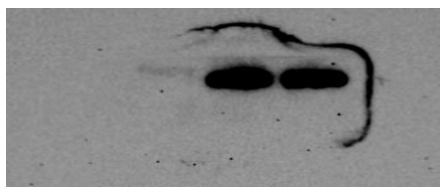

P-4E-BP1  
17KD

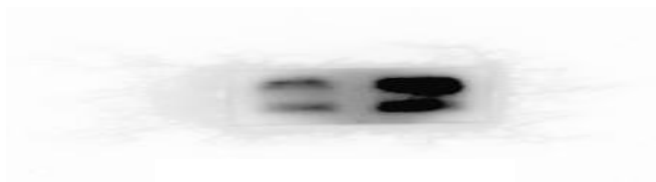

4E-BP1  
17KD

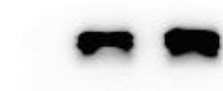

GAPDH  
36KD

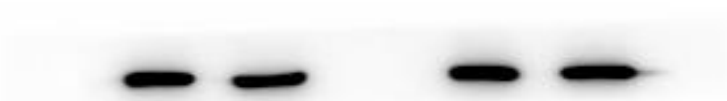

Data S4 Original images of Western blot, related to Figure 3A.

Hep3B

HA-  
CREB3L4  
43KD

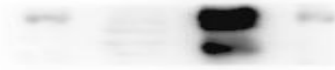

p-mTOR  
289KD

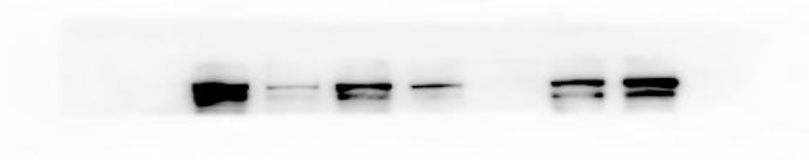

mTOR  
289KD

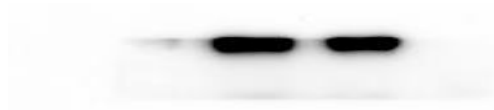

p-S6K1  
70KD

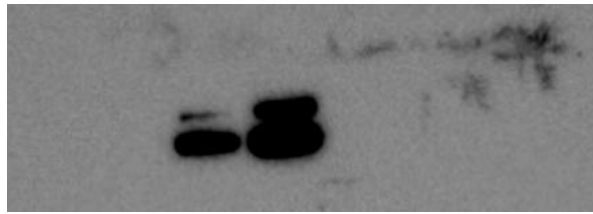

S6K1  
70KD

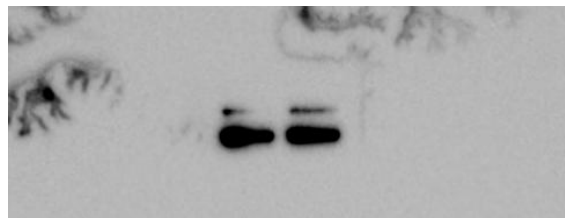

p-S6  
32KD

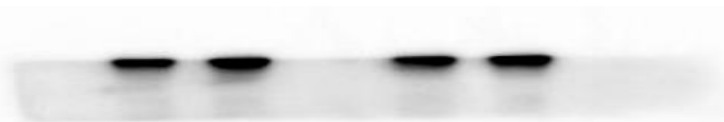

S6  
32KD

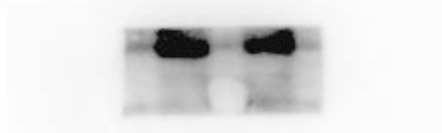

P-4E-BP1  
17KD

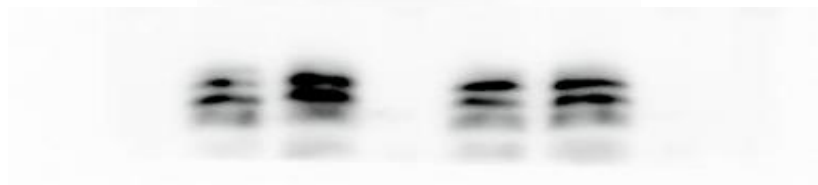

4E-BP1  
17KD

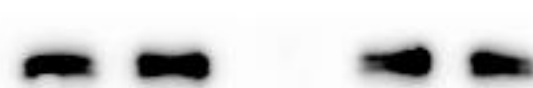

GAPDH  
36KD

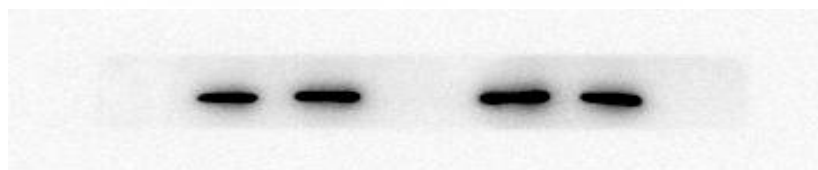

Data S5 Original images of Western blot, related to Figure 3A.

HUH7

CREB3L4  
43KD

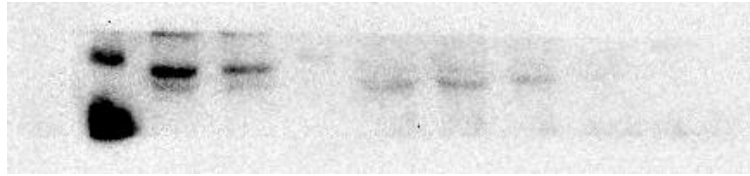

p-mTOR  
289KD

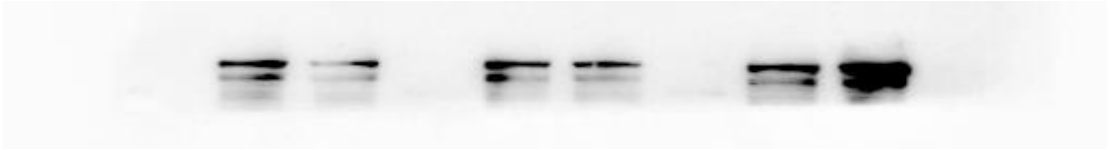

mTOR  
289KD

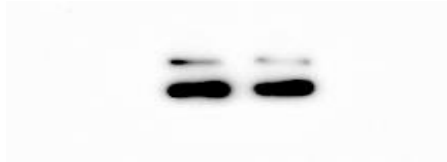

p-S6K1  
70KD

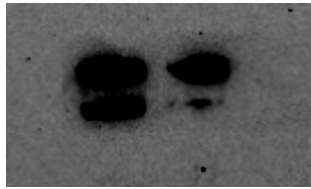

S6K1  
70KD

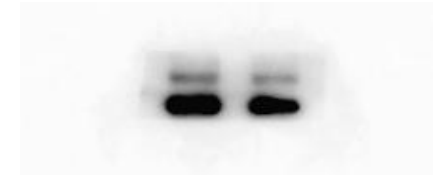

p-S6  
32KD

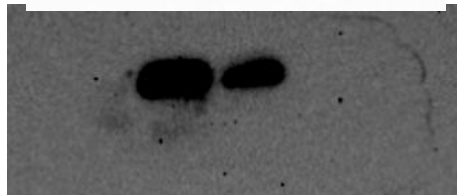

S6  
32KD

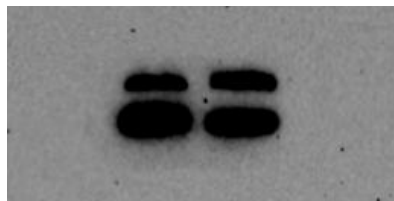

P-4E-BP1  
17KD

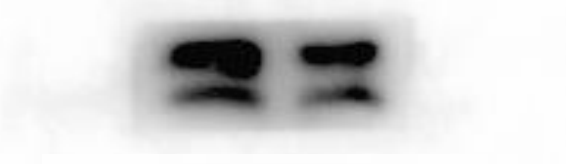

4E-BP1  
17KD

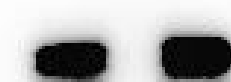

GAPDH  
36KD

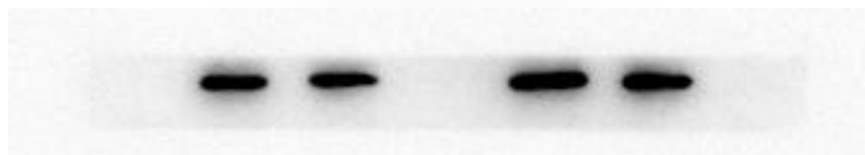

Data S6 Original images of Western blot, related to Figure 3B.

Hep3B

CREB3L4  
43KD

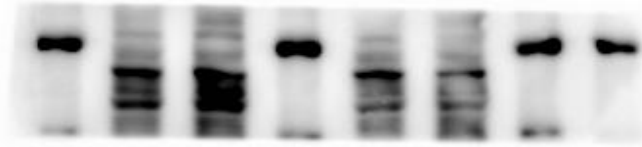

p-mTOR  
289KD

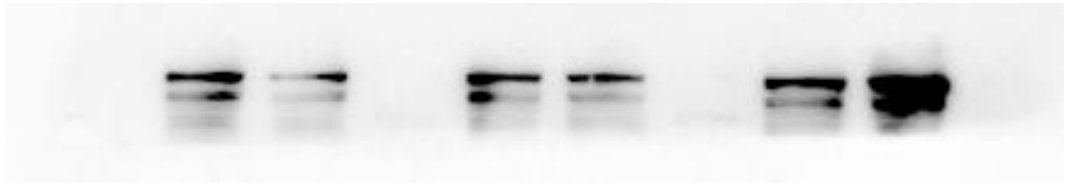

mTOR  
289KD

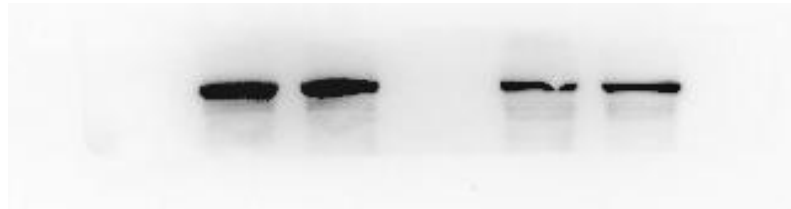

p-S6K1  
70KD

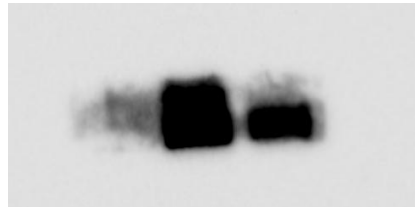

S6K1  
70KD

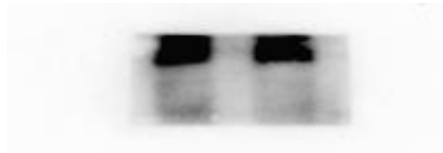

p-S6  
32KD

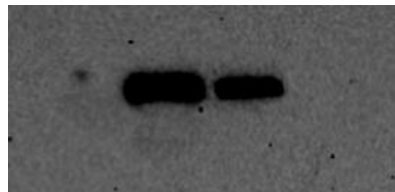

S6  
32KD

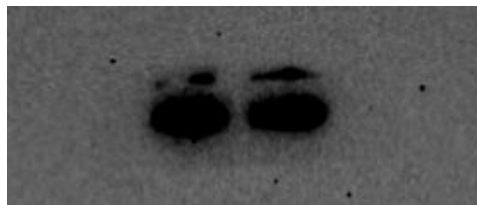

P-4E-BP1  
17KD

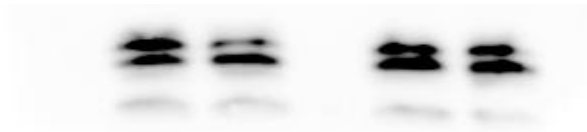

4E-BP1  
17KD

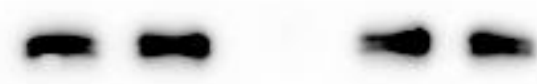

GAPDH  
36KD

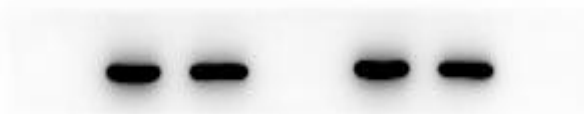

Data S7 Original images of Western blot, related to Figure 3B.

**HUH7**

**p-mTOR  
289KD**

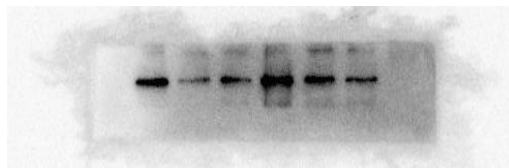

**p-S6  
32KD**

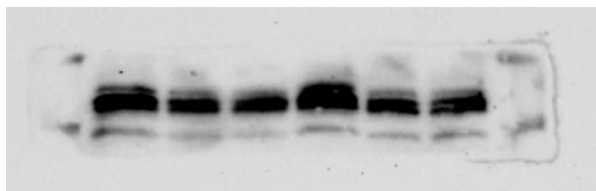

**CREB3L4  
43KD**

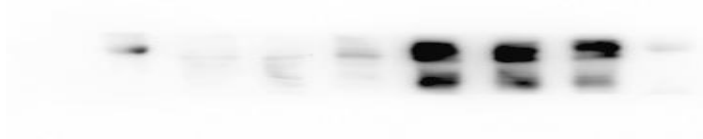

**GAPDH  
36KD**

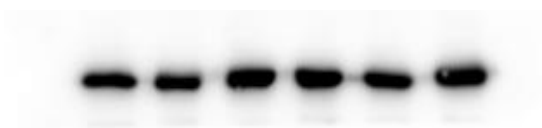

---

**Hep3B**

**p-mTOR  
289KD**

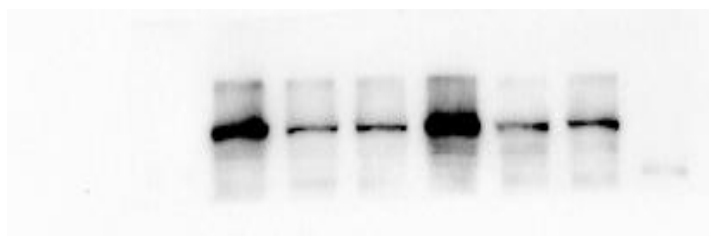

**p-S6  
32KD**

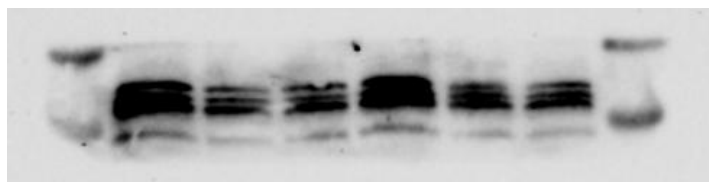

**CREB3L4  
43KD**

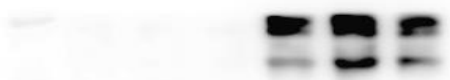

**GAPDH  
36KD**

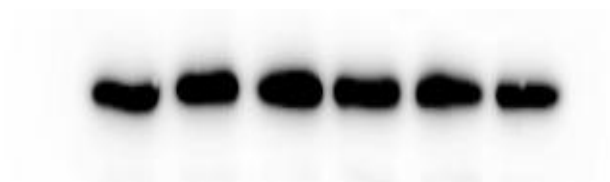

**Data S8 Original images of Western blot, related to Figure 3C.**

**HUH7**

**HA-  
CREB3L4  
43KD**

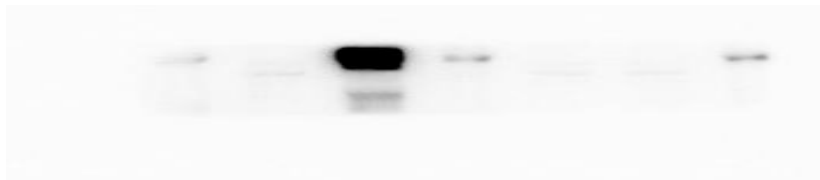

**RHEB  
16KD**

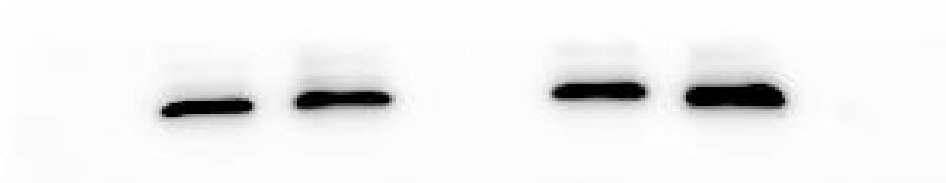

**GAPDH  
36KD**

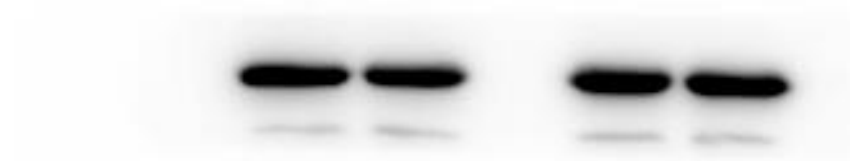

---

**Hep3B**

**HA-  
CREB3L4  
43KD**

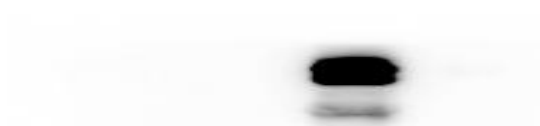

**RHEB  
16KD**

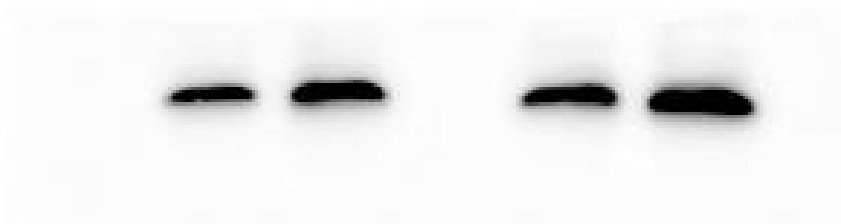

**GAPDH  
36KD**

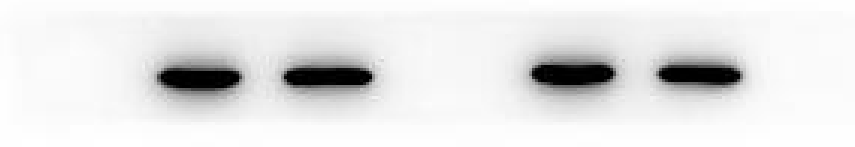

**Data S9 Original images of Western blot, related to Figure 4C.**



HUH7

CREB3L4  
43KD

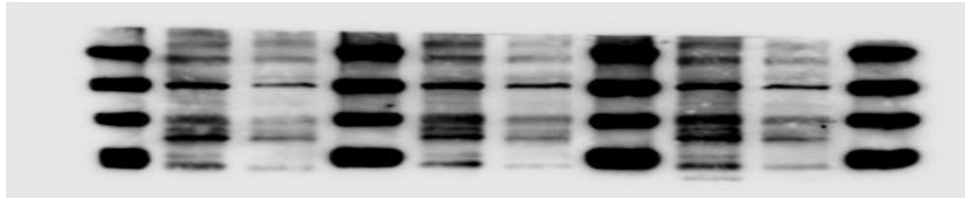

RHEB  
16KD

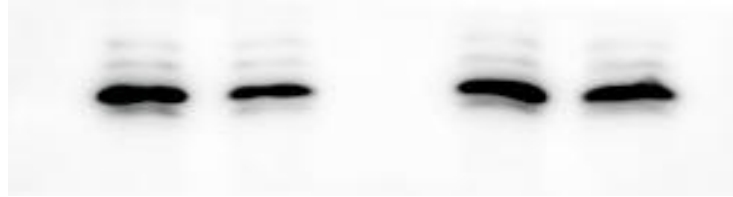

GAPDH  
36KD

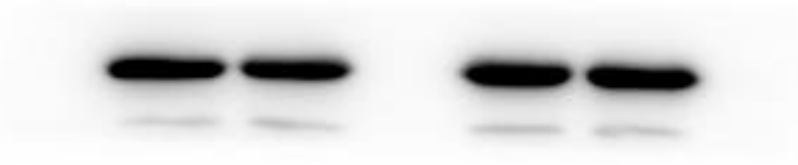

---

Hep3B

CREB3L4  
43KD

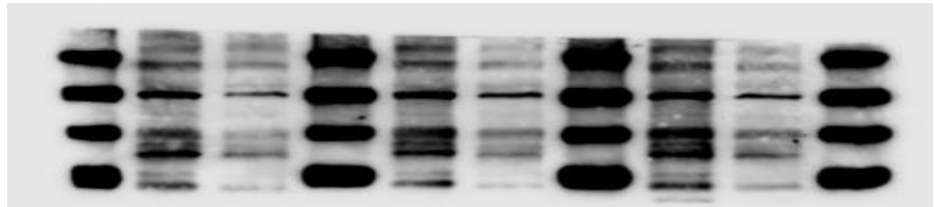

RHEB  
16KD

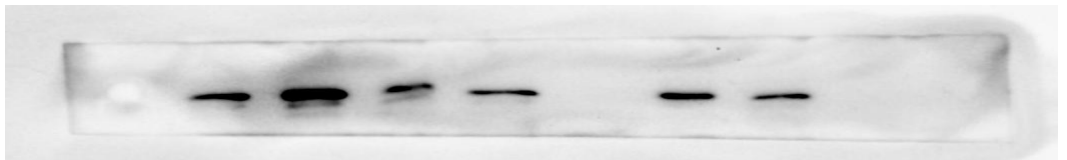

GAPDH  
36KD

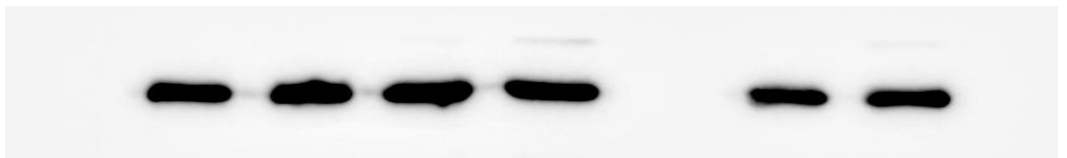

Data S10 Original images of Western blot, related to Figure 4D.

HUH7

CREB3L4  
43KD

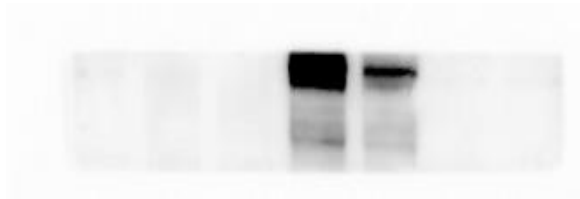

RHEB  
16KD

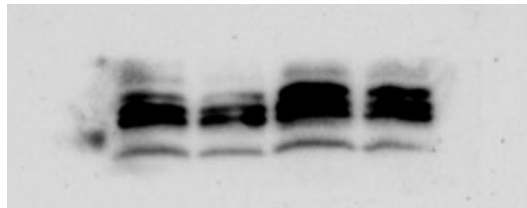

P-mTOR  
289KD

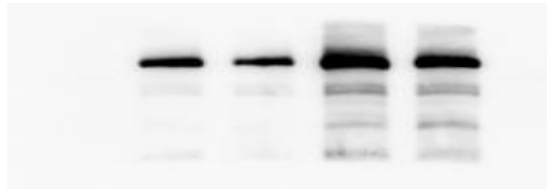

mTOR  
289KD

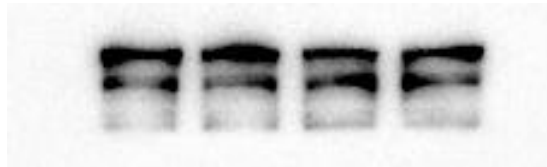

P-S6K1  
70KD

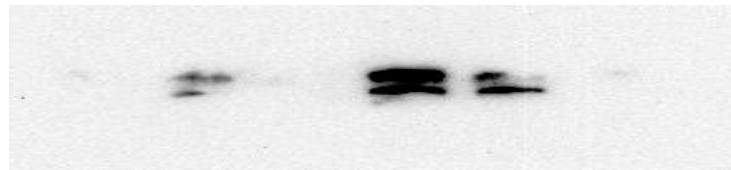

S6K1  
70KD

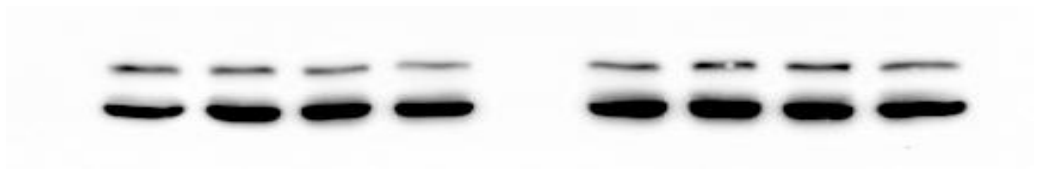

P-S6  
32KD

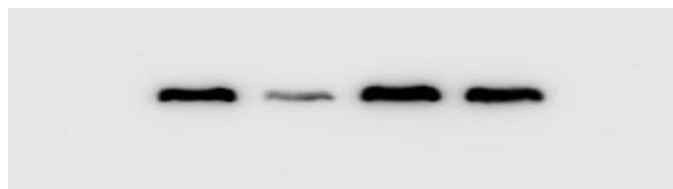

S6  
32KD

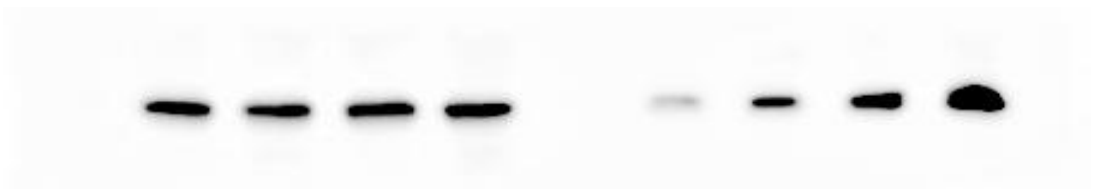

GAPDH  
36KD

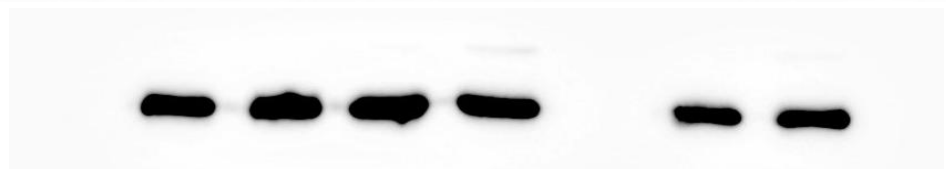

Data S11 Original images of Western blot, related to Figure 5G.

Hep3B

CREB3L4  
43KD

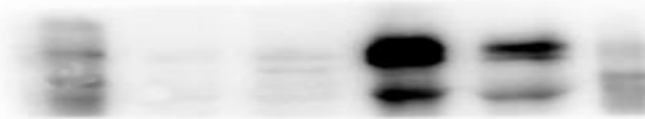

RHEB  
16KD

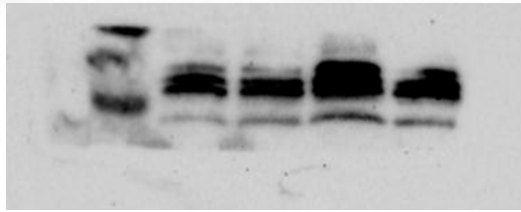

P-mTOR  
289KD

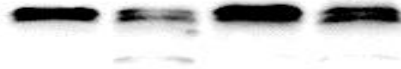

mTOR  
289KD

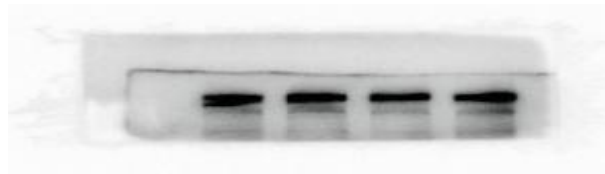

P-S6K1  
70KD

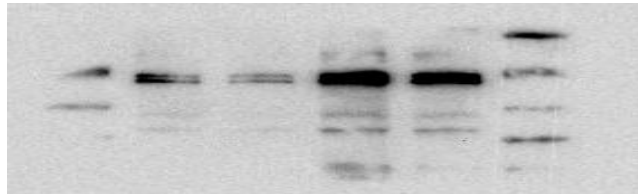

S6K1  
70KD

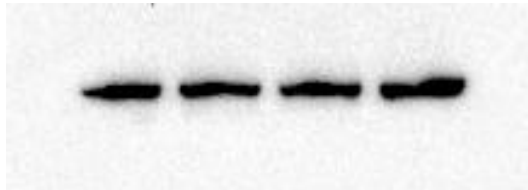

P-S6  
32KD

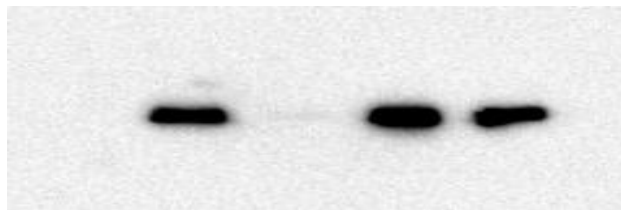

S6  
32KD

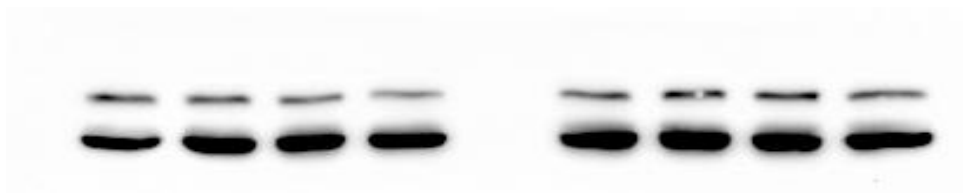

GAPDH  
36KD

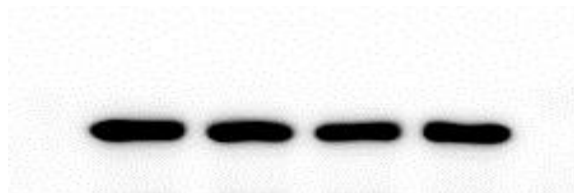

Data S12 Original images of Western blot, related to Figure 5G.

HUH7

CREB3L4  
43KD

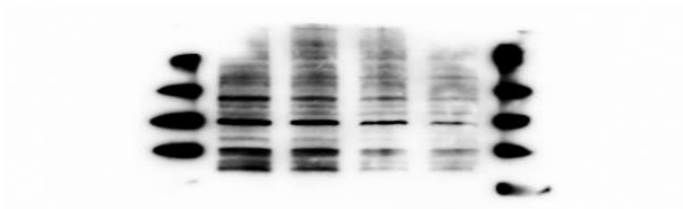

RHEB  
16KD

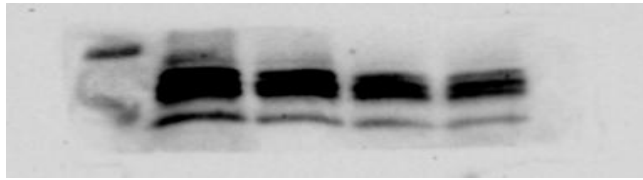

P-mTOR  
289KD

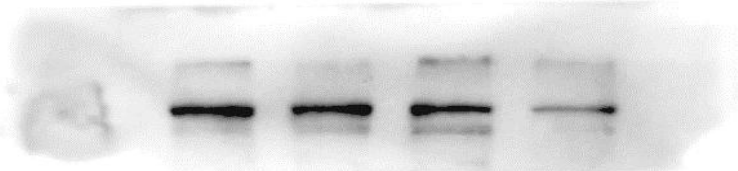

mTOR  
289KD

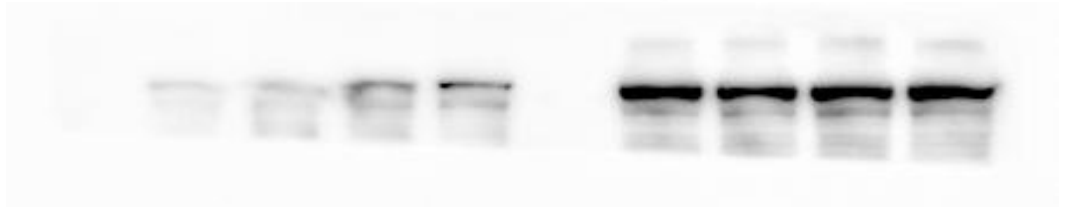

P-S6K1  
70KD

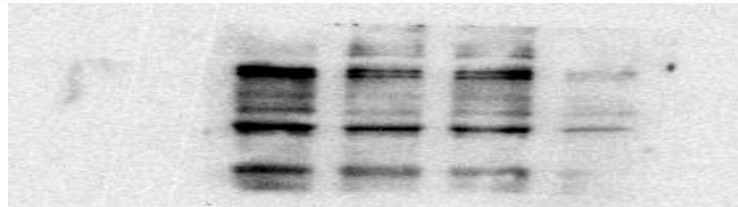

S6K1  
70KD

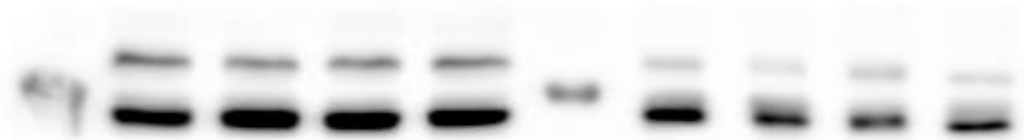

P-S6  
32KD

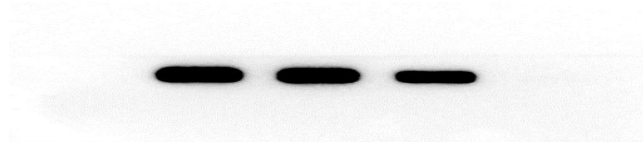

S6  
32KD

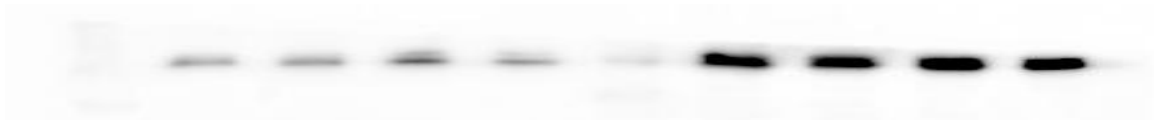

GAPDH  
36KD

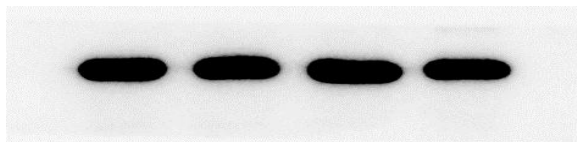

Data S13 Original images of Western blot, related to Figure 5H.

Hep3B

CREB3L4  
43KD

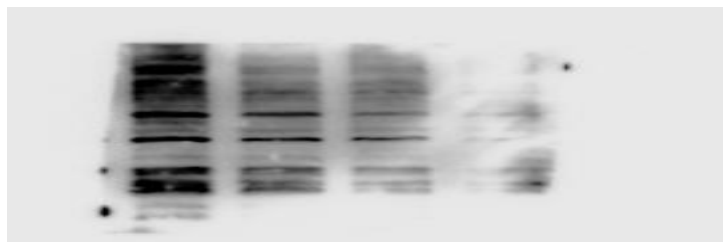

RHEB  
16KD

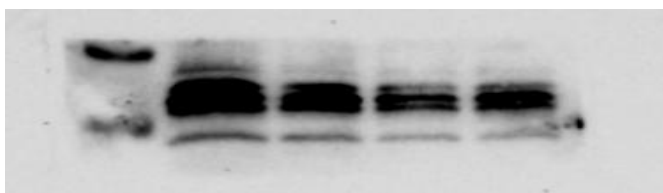

P-mTOR  
289KD

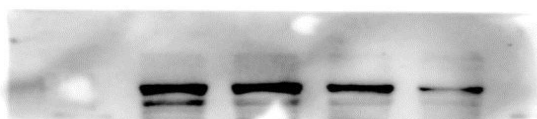

mTOR  
289KD

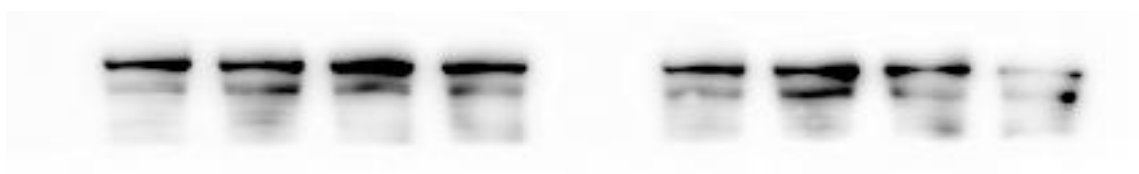

P-S6K1  
70KD

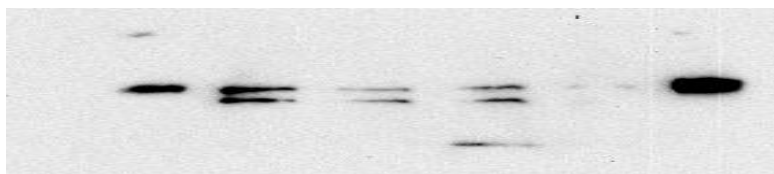

S6K1  
70KD

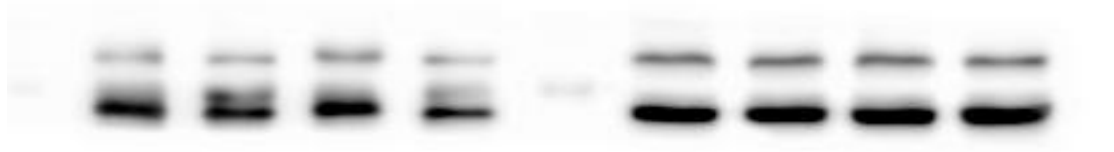

P-S6  
32KD

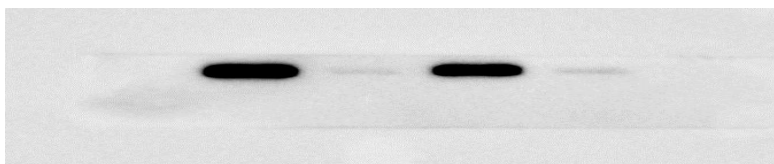

S6  
32KD

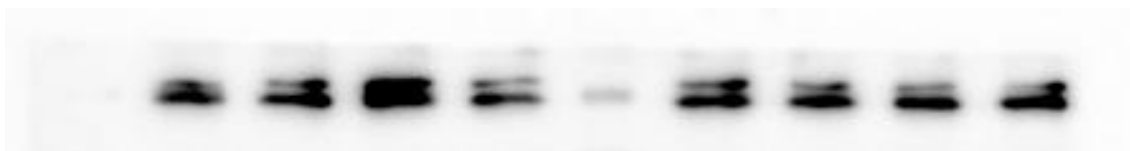

GAPDH  
36KD

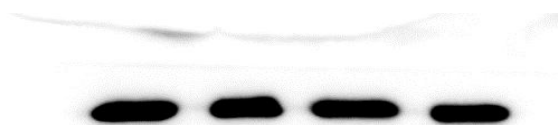

Data S14 Original images of Western blot, related to Figure 5H.

HUH7

RHEB  
16KD

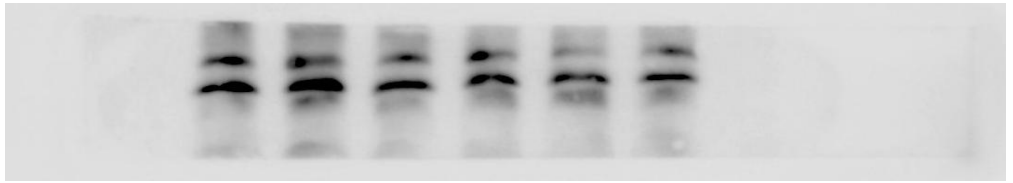

P-mTOR  
289KD

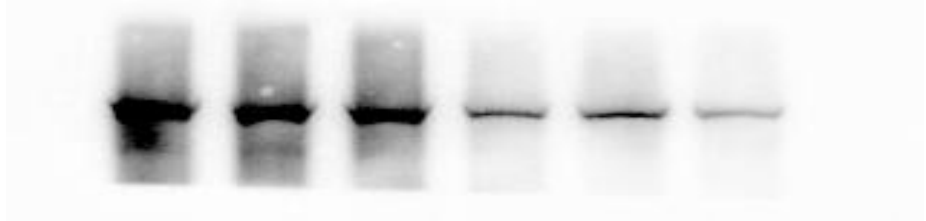

mTOR  
289KD

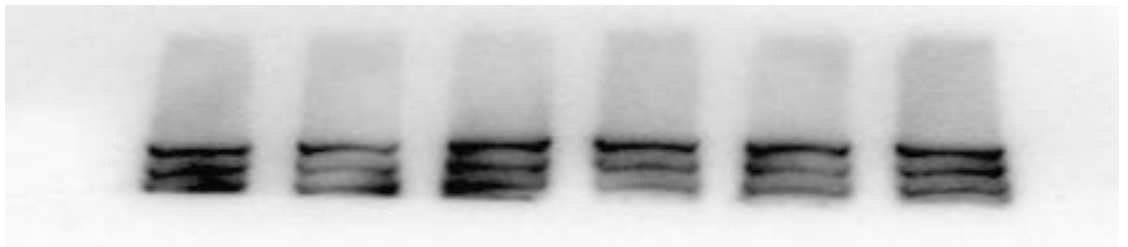

CREB3L4  
43KD

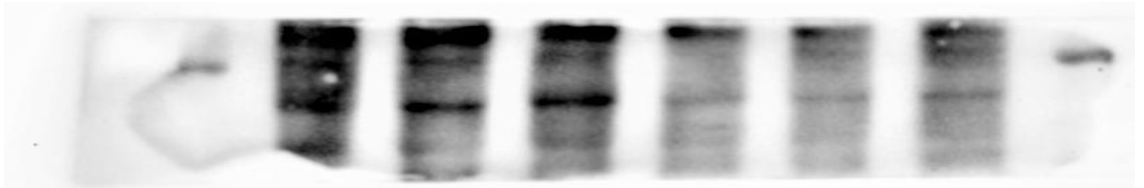

GAPDH  
36KD

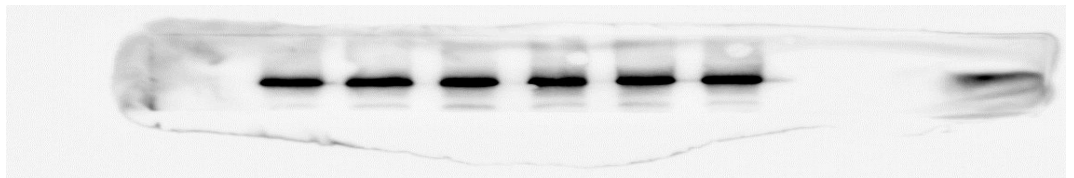

Data S15 Original images of Western blot, related to Figure 6C.

Hep3B

RHEB  
16KD

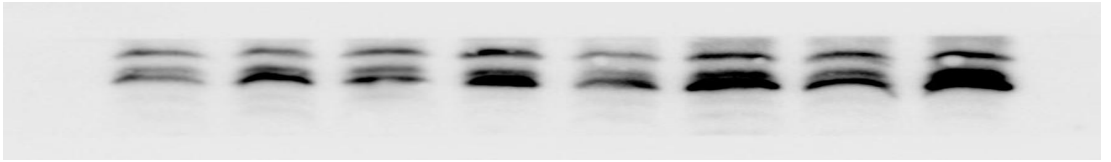

P-mTOR  
289KD

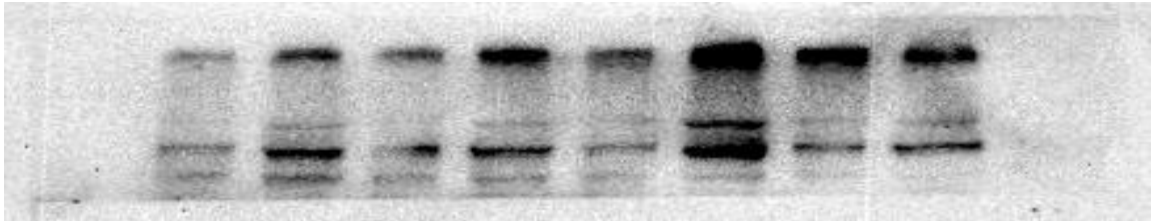

mTOR  
289KD

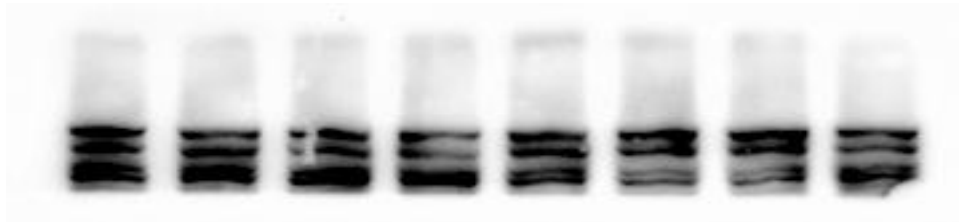

CREB3L4  
43KD

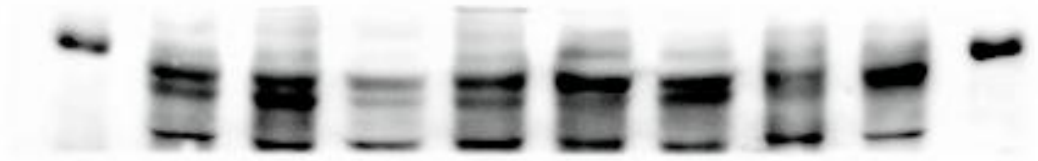

GAPDH  
36KD

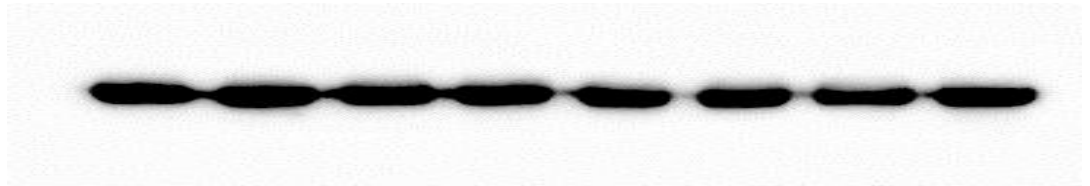

Data S16 Original images of Western blot, related to Figure 6D.

**CREB3L4  
43KD**

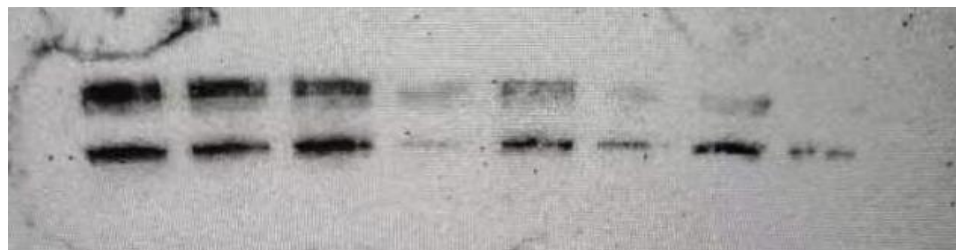

**GAPDH  
36KD**

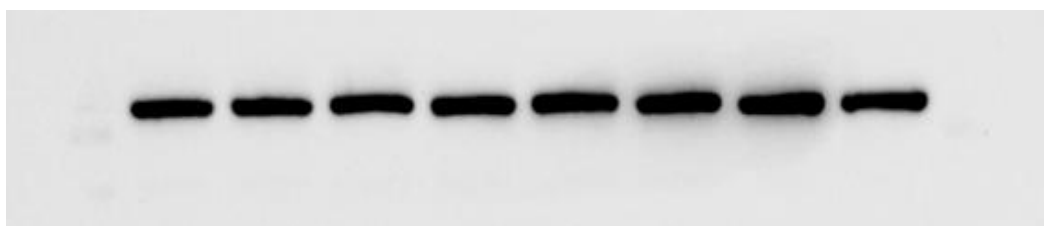

**Data S17 Original images of Western blot, related to Supplementary Figure 1A.**
